# Supplementary material for: Novel nanosynthesis of In2O3and its application as a resistive gas sensor for sevoflurane anesthetic
Source: Royal Society of Chemistry journal article supplement (doi:10.1039/c4tb01177e), 2014-11-03

## Supporting Information:

**Figure S1.**  $^{13}\text{C}$  NMR spectrum of the filtered reaction solution measured in  $\text{CDCl}_3$  of the  $\text{In}_2\text{O}_3$  oxide nanoparticles.

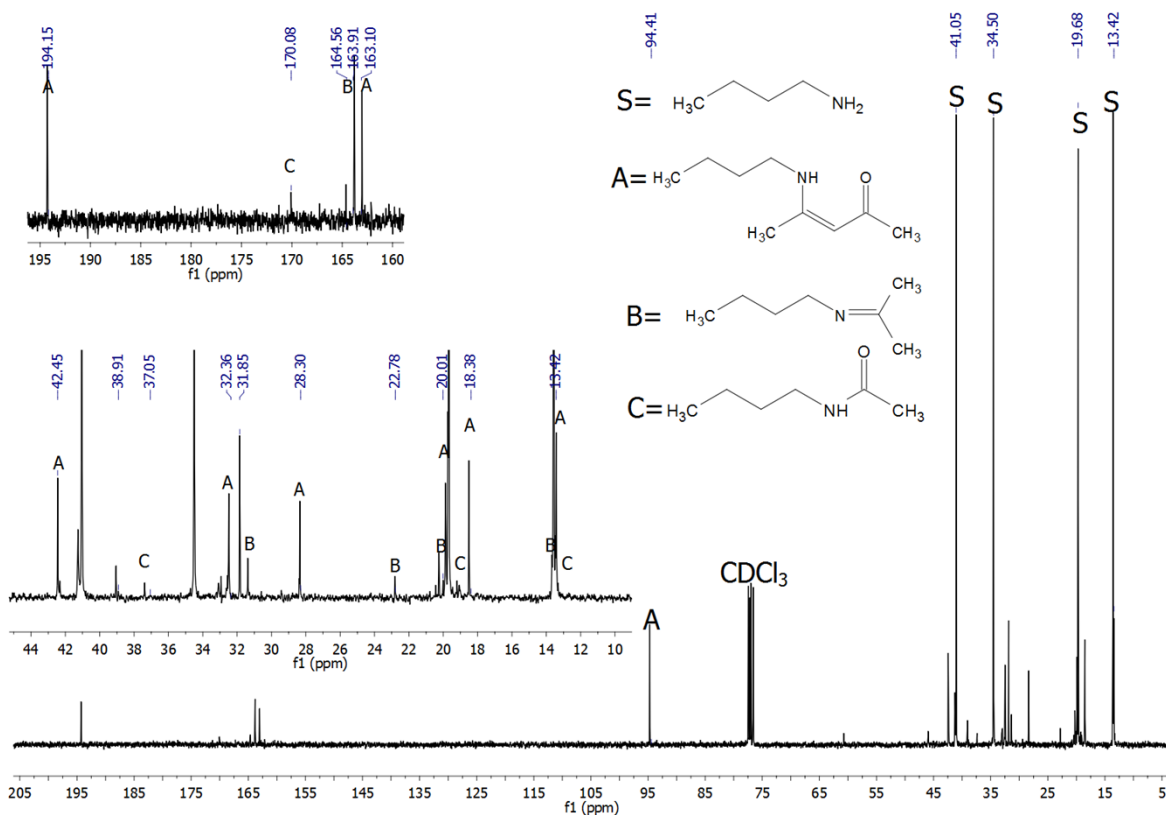

### NMR characterization or Assignment:

**S:** Butylamine

**A:** 4-(butylamino)pent-3-en-2-one

**B:** N-butylpropan-2-imine

**C:** N-butylacetamide

**Figure S2.** Kubelka-Munk elaboration of as synthesized  $\text{In}_2\text{O}_3$  DRS spectrum. The dashed line represents the  $x$ -axis intercept of the line tangent to the inflection point, corresponding to its apparent optical  $E_g$ , calculated with the Tauc procedure (2.73 eV).

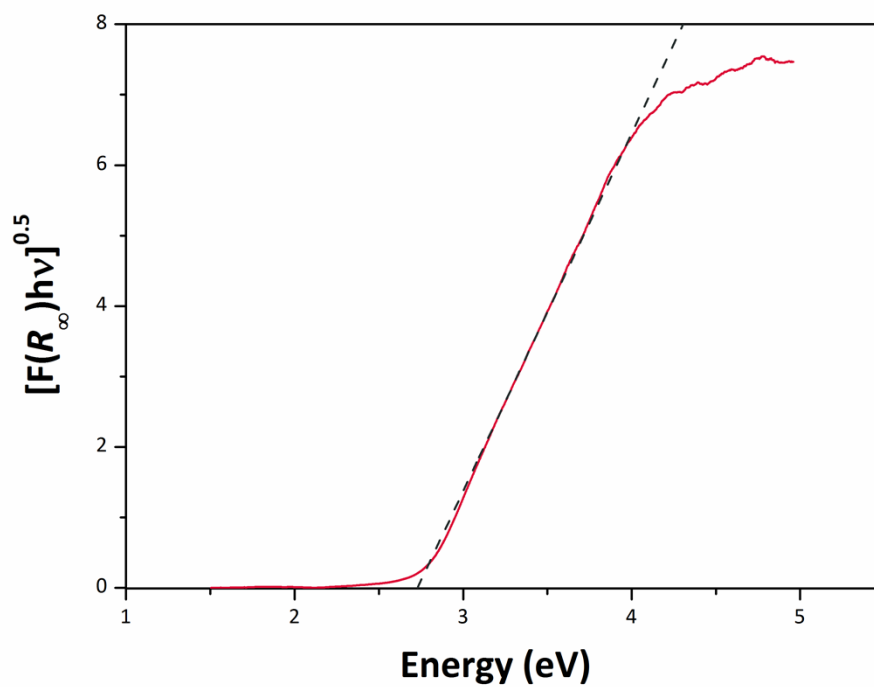

**Figure S3** Dynamic response obtained with FIA system for repetitive pulses of 1.5 ppm sevoflurane at operation temperature of 250 °C.

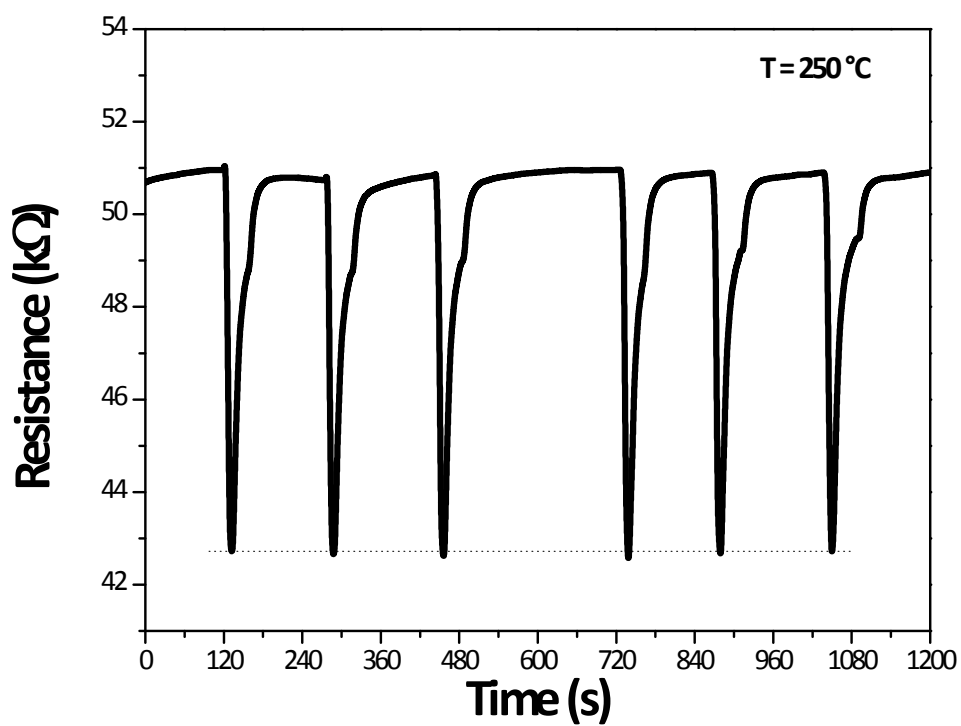

**Figure S4** TGA analysis of the as-prepared  $\text{In}_2\text{O}_3$  sample.

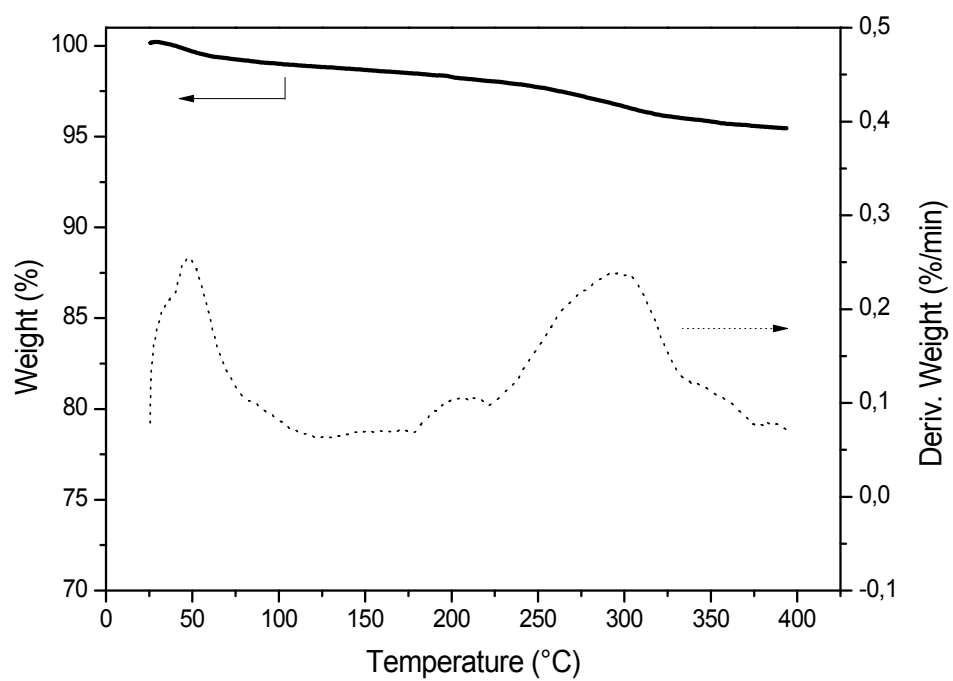

**Figure S5** Photographs of: a) the sensor before and after sensing layer deposition; b) the sensor mounted on the holder.

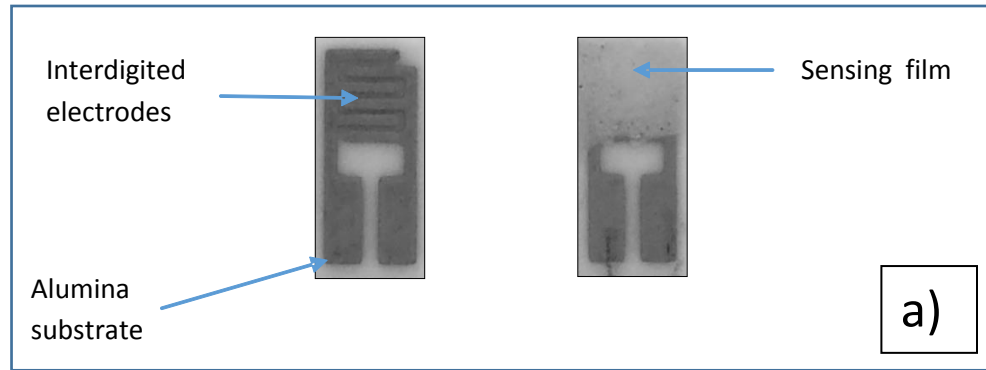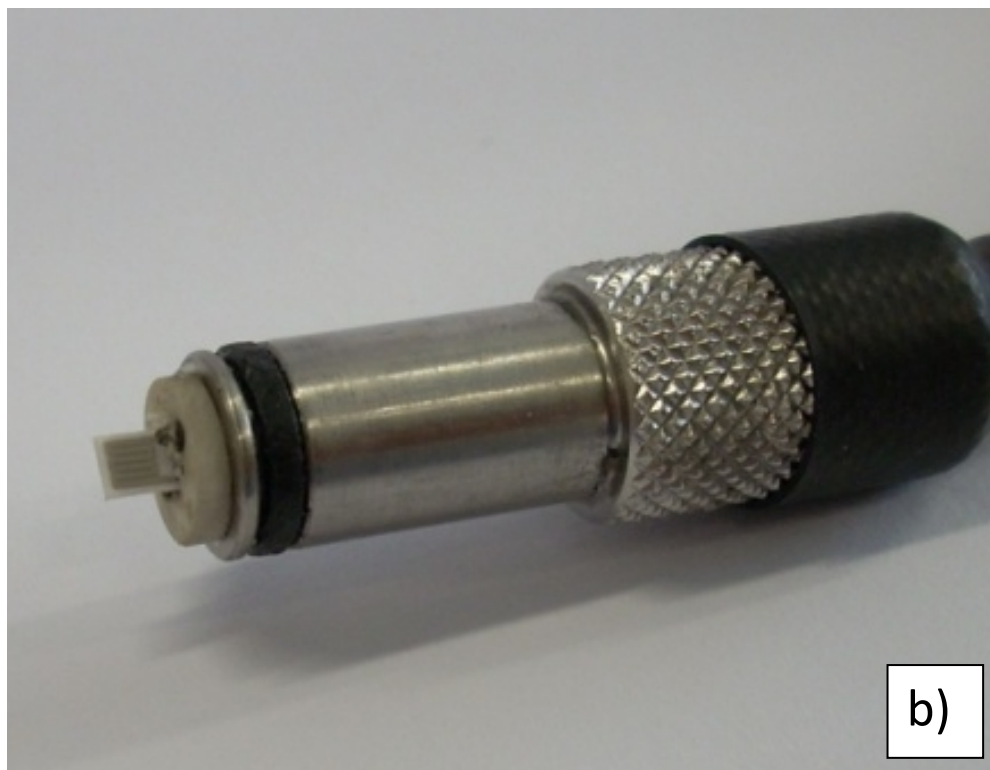

Supplement: c4tb01177e1.pdf [file c4tb01177e1.pdf]
